# Supplementary material
Source: PubMed Central journal article supplement (PMC7712457)
Supplement: NIHMS1648911-supplement-Materials.pdf [file NIHMS1648911-supplement-Materials.pdf]

Materials List for

# Detection of Total Reactive Oxygen Species in Adherent Cells by 2',7'-Dichlorodihydrofluorescein Diacetate Staining

Hyeoncheol Kim<sup>1</sup>, Xiang Xue<sup>1</sup>

<sup>1</sup>Department of Biochemistry and Molecular Biology, University of New Mexico

## Corresponding Author

Xiang Xue

xxue@salud.unm.edu

## Citation

Kim, H., Xue, X. Detection of Total Reactive Oxygen Species in Adherent Cells by 2',7'-Dichlorodihydrofluorescein Diacetate Staining. *J. Vis. Exp.* (), e60682, doi:10.3791/60682 (2020).

## Date Published

June 23, 2020

## DOI

10.3791/60682

## URL

jove.com/video/60682

## Materials

| Name                                   | Company                              | Catalog Number | Comments                                    |
|----------------------------------------|--------------------------------------|----------------|---------------------------------------------|
| 2',7'-Dichlorofluorescein diacetate    | Cayman Chemical, Ann Arbor, MI       | 20656          |                                             |
| Doxorubicin hydrochloride              | TCI America, Portland, OR            | D4193-25MG     |                                             |
| Dulbecco's Modified Eagle Medium       | Corning, Corning, NY                 | 45000-304      |                                             |
| Ferrous Sulfate Heptahydrate           | VWR, Radnor, PA                      | 97061-542      |                                             |
| Invitrogen EVOS FL Auto Imaging System | Thermo Fisher Scientific Waltham, MA | AMAFD1000      | or any other fluorescence microscope        |
| Protein assay Bradford solution        | Bio-Rad, Hercules, CA                | 5000001        |                                             |
| SpectraMax M2 Microplate Reader        | Molecular Devices, Radnor, PA        | 89429-532      | or any other fluorescence microplate reader |
